# Supplementary material for: Hagfish slime and mucin flow properties and their implications for defense
Source: PubMed Central journal article supplement (PMC4961968; doi:10.1038/srep30371), 2016-07-27
Supplement: srep30371-s6.pdf [file srep30371-s6.pdf]

## Supplementary information

### Hagfish slime and mucin flow properties and their implications for defense

Lukas Böni<sup>1</sup>, Peter Fischer<sup>1</sup>, Lukas Böcker<sup>1</sup>, Simon Kuster<sup>1,\*</sup>, and Patrick A. Rühs<sup>2</sup>

<sup>1</sup> Department of Health Science and Technology, ETH Zurich, 8092 Zurich, Switzerland

<sup>2</sup> Department of Materials, ETH Zurich, 8093 Zurich, Switzerland

\*E-mail: [simon.kuster@hest.ethz.ch](mailto:simon.kuster@hest.ethz.ch)

#### Supplementary Note:

- (a) Calculation of shear rate during knot sliding
- (b) List of suction feeding fish preying on hagfish

#### Supplementary Video 1:

A hagfish is trapped in its own slime. To avoid self-asphyxiation, the hagfish forms a sliding knot to shear off the slime.

#### Supplementary Video 2:

Complex flow behaviour of natural hagfish slime and sample loading

#### Supplementary Video 3:

Hagfish mucin viscoelasticity and the effect of shear

#### Supplementary Video 4:

Extensional elastic properties of mucins in hagfish slime

#### Supplementary Video 5:

Liquid filament thinning event of natural hagfish mucin in a CaBER (Capillary Breakup Extensional Rheometer), recorded at 5000 fps with a play rate of 24 fps.

## Supplementary Note 4:

### (a) Calculation of shear rate during knot sliding

Assuming a hagfish body length  $l = 0.2$  m, a knotting time of  $t = 1$  s, and a gap range between the sliding surfaces of  $h = 0.001 - 0.01$  m

This equals a sliding velocity of  $v = l/t = 0.2$  m/s

According to  $\gamma = v/h$  this corresponds to an average shear rate of  $\gamma \approx 20 - 200$  s<sup>-1</sup> during knot sliding.

### (b) Selection of suction feeders preying on hagfish

| Predator / Predator family                       | Preys on hagfish         | Uses suction feeding       |
|--------------------------------------------------|--------------------------|----------------------------|
| <i>Polyprion americanus</i> (Atlantic wreckfish) | Zintzen et al., (2011)   | Brick Peres et al., (2003) |
| <i>Congridae</i> (Conger eels)                   | Zintzen et al., (2011)   | De Schepper et al., (2007) |
| <i>Squalidae</i> (Spiny dogfishes)               | Zintzen et al., (2011)   | Wilga et al., (1998)       |
| <i>Otaria flavescens</i> (Southern sea lion)     | Jørgensen et al., (1998) | Berta et al., (2005)       |
| <i>Gadus callarias</i> (Codfish)                 | Jørgensen et al., (1998) | Muller et al., (1984)      |
| <i>Phoca vitulina</i> (Harbour seal)             | Jørgensen et al., (1998) | Marshall et al., (2014)    |

1. Zintzen, V. *et al.* Hagfish predatory behaviour and slime defence mechanism. *Sci. Rep.* **1**, (2011).
2. Brick Peres, M. & Haimovici, E. Alimentação do cherne-poveiro *Polyprion americanus* (Polyprionidae, Teleostei) no sul do Brasil. *Atlântica, Rio Gd.* **25**, 201–208 (2003).
3. De Schepper, N., De Kegel, B. & Adriaens, D. Morphological Specializations in Heterocongrinae (Anguilliformes: Congridae) Related to Burrowing and Feeding. *J. Morphol.* **268**, 343–356 (2007).
4. Wilga, C. D. & Motta, P. J. Conservation and variation in the feeding mechanism of the spiny dogfish *squalus acanthias*. *J. Exp. Biol.* **201**, 1345–1358 (1998).
5. Jørgensen, J. M., Lomholt, J. P., Weber, R. E. & Malte, H. *The Biology of Hagfishes*. (Chapman & Hall, 1998).

6. Berta, A., Sumich, J. L. & Kovacs, K. M. *Marine mammals: evolutionary biology*. (Academic Press, 2005).
7. Muller, M. & Osse, J. W. M. Hydrodynamics of suction feeding in fish. *Trans. Zool. Soc. Lond.* **37**, 51–135 (1984).
8. Marshall, C. D. *et al.* Feeding kinematics, suction, and hydraulic jetting performance of harbor seals (*Phoca vitulina*). *PLoS One* **9**, 1–11 (2014).
